# Supplementary material
Source: Royal Society of Chemistry journal article supplement (doi:10.1039/d5qi01908g)
Supplement: d5qi01908g1.pdf [file d5qi01908g1.pdf]

**Mixed-Valent  $\text{Ln}_2@C_{79}\text{N}$  Endohedral Metallofullerenes: Magnetic Exchange, Magnetic Anisotropy, and Electric-Field Control of SMM Characteristics**

Tanu Sharma and Gopalan Rajaraman\*

Department of Chemistry, Indian Institute of Technology Bombay, Mumbai-400076, India.  
email: [rajaraman@chem.iitb.ac.in](mailto:rajaraman@chem.iitb.ac.in)).

## Computational Details

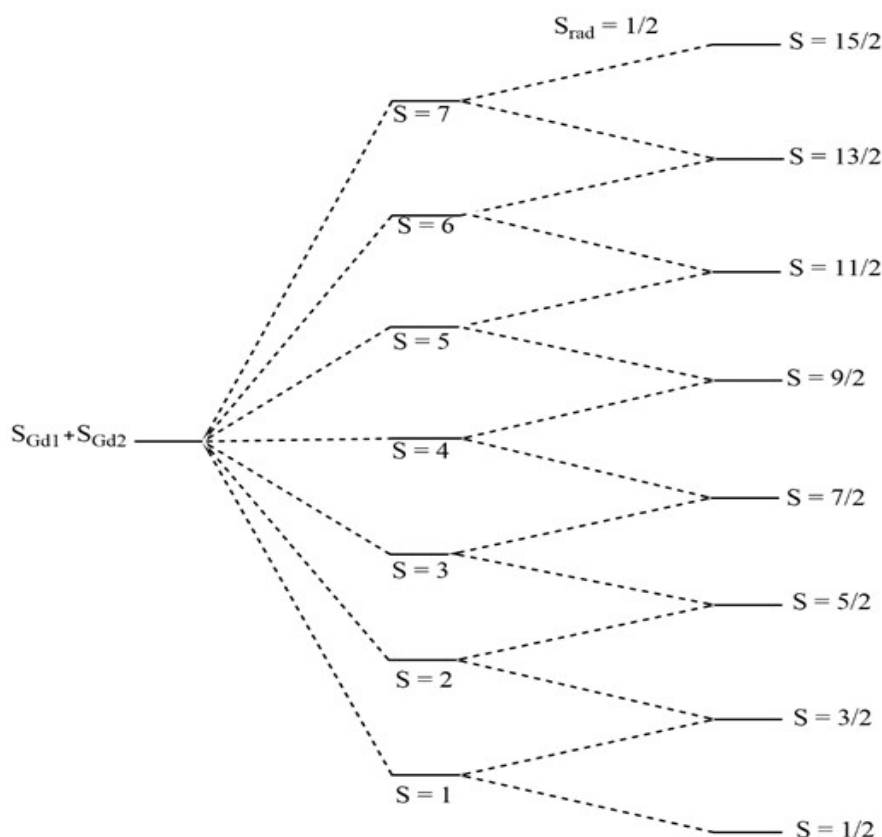

Scheme S1: The qualitative MO scheme of the formation of various spin states from the spin of two Gd centres and one unpaired electron between them.

The energy of a spin state of  $Gd_2@C_{79}N$  is represented by Equation (2) with the Hamiltonian Equation (1);<sup>1,2</sup>

$$H = -J(S_A S_B O_A + S_A S_B O_B) + B T_{AB} \dots \dots (1),$$

$$E(S, \pm) = -\frac{J}{2}S(S+1) \pm B\left(S + \frac{1}{2}\right) \dots \dots (2),$$

Here,  $J$  and  $B$  is the interaction and delocalisation parameter respectively.  $A$  and  $B$  corresponds to the Gd1 and Gd2 centre respectively.  $S$  is the total spin multiplicity (see scheme S1), where the additive combination is represented by  $E(S,+)$  and the subtractive combination is represented by  $E(S,-)$ . Consider a spin state  $S = 13/2$ , which can be formed

by two combinations;  $\left[S_{Gd1} = \frac{7}{2}\right] + \left[S_{Gd2} = \frac{5}{2}\right] + \left[S_{rad} = \frac{1}{2}\right]$  or

$\left[S_{Gd1} = \frac{7}{2}\right] + \left[S_{Gd2} = \frac{7}{2}\right] - \left[S_{rad} = \frac{1}{2}\right]$ . The former one is represented as  $E(S,+)$  while the latter one is denoted as  $E(S,-)$ .

**Table S1:** Term symbols and the number of roots computed in CASSCF calculations for different Ln ions.

| Metal             | Term Symbol                   | Number of roots           |
|-------------------|-------------------------------|---------------------------|
| Ce <sup>III</sup> | <sup>2</sup> F <sub>5/2</sub> | 7 doublets                |
| Pr <sup>III</sup> | <sup>3</sup> H <sub>4</sub>   | 21 triplets, 28 singlets  |
| Nd <sup>III</sup> | <sup>4</sup> I <sub>9/2</sub> | 35 quartets, 112 doublets |
| Pm <sup>III</sup> | <sup>5</sup> I <sub>4</sub>   | 35 quintets, 210 triplets |

Here  $T_{AB}$  is the electron transfer operator

$$T_{AB} \left| S_A S_B S >^A = \left( S + \frac{1}{2} \right) \left| S_A S_B S >^B \dots\dots (3)$$

and  $T_{AB} \left| S_A S_B S >^B = \left( S + \frac{1}{2} \right) \left| S_A S_B S >^A \dots\dots(4)$

$O_A$  and  $O_B$  electron localisation operator

$$O_B |B, S, M_s > = |B, S, M_s > \dots\dots (5)$$

$$O_B |A, S, M_s > = 0 \dots\dots (6)$$

The delocalisation parameter B is determined with Equation (7), where the energies of E(S,+) and E(S,-) states has been computed by ab initio CASSCF calculation.

$$B = \frac{E(S, +) - E(S, -)}{2S + 1} \dots\dots (7)$$

On the other hand, using Heisenberg Hamilton

$\hat{H}^H = -J_1(S_{Gd1}S_{rad} + S_{Gd2}S_{rad}) - J_2S_{Gd1}S_{Gd2}$ , the energy of a spin state (S) is computed with Equation (8);<sup>3</sup>

$$E^H(S, \pm) = \pm \left( \frac{J_1 - J_2}{2} \right) \left( S + \frac{1}{2} \right) - \frac{J_2}{2} [S(S + 1) - S_{max}^{DE}(S_{max}^{DE} + 1)] \dots\dots(8)$$

where  $J_1$  is the metal–radical exchange, and  $J_2$  is the metal–metal exchange interaction. The DE represents double exchange,  $S_{max}$  represents maximum spin multiplicity. Comparing the Equation (2) and (8), one can derive

$$J_1 = 2B + J_2 \dots\dots (9)$$

$$J_2 = \frac{1}{S} [\{(E(S - 1, -) - E(S, -))\} - B] \dots\dots (10)$$

|                   |                                |                           |
|-------------------|--------------------------------|---------------------------|
| Sm <sup>III</sup> | <sup>6</sup> H <sub>5/2</sub>  | 21 sextets, 224 quartets  |
| Eu <sup>III</sup> | <sup>7</sup> F <sub>0</sub>    | 7 heptets, 140 quintets   |
| Gd <sup>III</sup> | <sup>8</sup> S <sub>7/2</sub>  | –                         |
| Tb <sup>III</sup> | <sup>7</sup> F <sub>6</sub>    | 7 heptets, 140 quintets   |
| Dy <sup>III</sup> | <sup>6</sup> H <sub>15/2</sub> | 21 sextets, 224 quartets  |
| Ho <sup>III</sup> | <sup>5</sup> I <sub>8</sub>    | 35 quintets, 210 triplets |
| Er <sup>III</sup> | <sup>4</sup> I <sub>15/2</sub> | 35 quartets, 112 doublets |
| Tm <sup>III</sup> | <sup>3</sup> H <sub>6</sub>    | 21 triplets, 28 singlets  |
| Yb <sup>III</sup> | <sup>2</sup> F <sub>7/2</sub>  | 7 doublets                |

**Table S2:** Complexes and their corresponding Ln–Ln bond distances.

| Metal                  | Ln–Ln bond distance (Å) | Metal                  | Ln–Ln bond distance(Å) |
|------------------------|-------------------------|------------------------|------------------------|
| <b>1</b> <sub>Ce</sub> | 3.588                   | <b>1</b> <sub>Tb</sub> | 3.751                  |
| <b>1</b> <sub>Pr</sub> | 3.382                   | <b>1</b> <sub>Dy</sub> | 3.417                  |
| <b>1</b> <sub>Nd</sub> | 3.398                   | <b>1</b> <sub>Ho</sub> | 3.425                  |
| <b>1</b> <sub>Pm</sub> | 3.666                   | <b>1</b> <sub>Er</sub> | 3.761                  |
| <b>1</b> <sub>Sm</sub> | 3.452                   | <b>1</b> <sub>Tm</sub> | 3.444                  |
| <b>1</b> <sub>Gd</sub> | 3.737                   | <b>1</b> <sub>Yb</sub> | 3.438                  |

**Table S3:** Mulliken Spin populations in (Ln1, Ln2, cage) in all Ln<sub>2</sub>@C<sub>79</sub>N complexes, where Ln varies from Ce to Yb.

| Metal                  | Spin density         | Metal                  | Spin density         |
|------------------------|----------------------|------------------------|----------------------|
| <b>1</b> <sub>Ce</sub> | 1.852, 1.259, -0.111 | <b>1</b> <sub>Tb</sub> | 6.551, 6.545, -0.097 |
| <b>1</b> <sub>Pr</sub> | 3.018, 3.019, -1.103 | <b>1</b> <sub>Dy</sub> | 4.527, 4.517, 1.955  |
| <b>1</b> <sub>Nd</sub> | 4.029, 4.034, -1.064 | <b>1</b> <sub>Ho</sub> | 3.502, 3.500, 1.997  |
| <b>1</b> <sub>Pm</sub> | 4.023, 5.029, -0.268 | <b>1</b> <sub>Er</sub> | 3.412, 3.402, 0.184  |
| <b>1</b> <sub>Sm</sub> | 6.061, 6.063, -1.125 | <b>1</b> <sub>Tm</sub> | 1.492, 1.487, 2.020  |
| <b>1</b> <sub>Gd</sub> | 7.586, 7.560, -0.167 | <b>1</b> <sub>Yb</sub> | 0.484, 0.481, 2.034  |

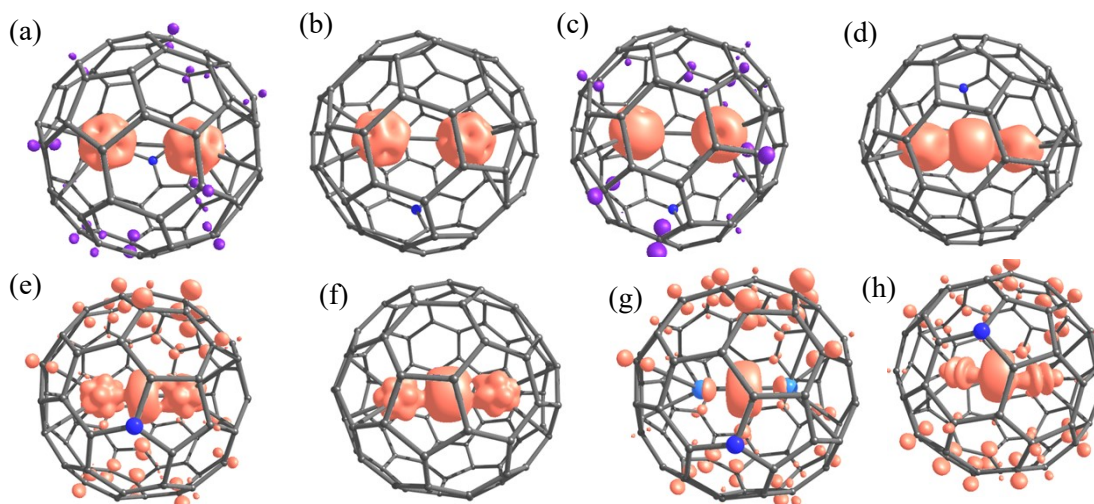

**Figure S1:** The optimized structures of (a)  $1_{Pm}$ , (b)  $1_{Nd}$ , (c)  $1_{Sm}$ , (d)  $1_{Tb}$ , (e)  $1_{Er}$ , (f)  $1_{Ho}$ , (g)  $1_{Tm}$  and (h)  $1_{Yb}$ .

| <b>Table S4:</b> Occupation of various orbitals in $Ln_2@C_{79}N$ complexes.* |                                  |       |       |       |       |       |       |
|-------------------------------------------------------------------------------|----------------------------------|-------|-------|-------|-------|-------|-------|
| Atom no.                                                                      | Orbital                          | Ce    | Pr    | Nd    | Pm    | Sm    | Gd    |
| Alpha                                                                         |                                  |       |       |       |       |       |       |
| 1                                                                             | 6S                               | 0.002 | 0.001 | 0.001 | 0.001 | 0.001 | 0.221 |
| 1                                                                             | 6px                              | 0.002 | 0.001 | 0.001 | 0.064 | 0.036 | 0.224 |
| 1                                                                             | 6py                              | 0.018 | 0.016 | 0.014 | 0.022 | 0.013 | 0.027 |
| 1                                                                             | 6pz                              | 0.018 | 0.015 | 0.014 | 0.024 | 0.013 | 0.022 |
| 1                                                                             | 5dxy                             | 0.071 | 0.069 | 0.064 | 0.139 | 0.059 | 0.114 |
| 1                                                                             | 5dxz                             | 0.071 | 0.066 | 0.062 | 0.150 | 0.050 | 0.117 |
| 1                                                                             | 5dyz                             | 0.048 | 0.041 | 0.039 | 0.115 | 0.036 | 0.074 |
| 1                                                                             | 5dx <sup>2</sup> -y <sup>2</sup> | 0.129 | 0.070 | 0.066 | 0.177 | 0.059 | 0.163 |
| 1                                                                             | 5dz <sup>2</sup>                 | 0.079 | 0.050 | 0.047 | 0.103 | 0.045 | 0.102 |
| 1                                                                             | 4f <sub>0</sub>                  | 0.028 | 0.302 | 0.640 | 0.878 | 0.997 | 1.000 |
| 1                                                                             | 4f <sub>+1</sub>                 | 0.265 | 0.238 | 0.515 | 0.448 | 0.968 | 1.000 |
| 1                                                                             | 4f <sub>-1</sub>                 | 0.134 | 0.675 | 0.512 | 0.281 | 0.628 | 1.000 |
| 1                                                                             | 4f <sub>+2</sub>                 | 0.166 | 0.485 | 0.738 | 0.710 | 0.996 | 1.000 |
| 1                                                                             | 4f <sub>-2</sub>                 | 0.599 | 0.449 | 0.435 | 0.625 | 0.997 | 1.000 |
| 1                                                                             | 4f <sub>+3</sub>                 | 0.366 | 0.570 | 0.860 | 0.708 | 0.719 | 1.000 |
| 1                                                                             | 4f <sub>-3</sub>                 | 0.119 | 0.232 | 0.269 | 0.426 | 0.673 | 1.000 |
| 2                                                                             | 6S                               | 0.003 | 0.001 | 0.001 | 0.001 | 0.001 | 0.230 |
| 2                                                                             | 6px                              | 0.095 | 0.001 | 0.001 | 0.043 | 0.001 | 0.223 |
| 2                                                                             | 6py                              | 0.025 | 0.015 | 0.013 | 0.012 | 0.012 | 0.025 |
| 2                                                                             | 6pz                              | 0.025 | 0.016 | 0.014 | 0.012 | 0.013 | 0.021 |
| 2                                                                             | 5dxy                             | 0.112 | 0.068 | 0.062 | 0.069 | 0.054 | 0.108 |
| 2                                                                             | 5dxz                             | 0.108 | 0.072 | 0.061 | 0.065 | 0.053 | 0.102 |
| 2                                                                             | 5dyz                             | 0.076 | 0.036 | 0.038 | 0.047 | 0.034 | 0.081 |
| 2                                                                             | 5dx <sup>2</sup> -y <sup>2</sup> | 0.164 | 0.071 | 0.066 | 0.099 | 0.064 | 0.157 |

|       |         |       |       |       |       |       |       |
|-------|---------|-------|-------|-------|-------|-------|-------|
| 2     | 5dz2    | 0.106 | 0.050 | 0.053 | 0.074 | 0.045 | 0.107 |
| 2     | 4f0     | 0.123 | 0.358 | 0.542 | 0.788 | 0.775 | 1.000 |
| 2     | 4f+1    | 0.125 | 0.346 | 0.730 | 0.739 | 0.568 | 1.000 |
| 2     | 4f-1    | 0.148 | 0.702 | 0.435 | 0.658 | 0.769 | 1.000 |
| 2     | 4f+2    | 0.111 | 0.294 | 0.694 | 0.866 | 0.982 | 1.000 |
| 2     | 4f-2    | 0.308 | 0.301 | 0.428 | 0.500 | 0.901 | 1.000 |
| 2     | 4f+3    | 0.263 | 0.359 | 0.564 | 0.379 | 0.993 | 1.000 |
| 2     | 4f-3    | 0.013 | 0.587 | 0.574 | 0.962 | 0.990 | 1.000 |
| Beta  |         |       |       |       |       |       |       |
| 1     | 6S      | 0.001 | 0.001 | 0.001 | 0.001 | 0.001 | 0.035 |
| 1     | 6px     | 0.001 | 0.001 | 0.001 | 0.047 | 0.036 | 0.031 |
| 1     | 6py     | 0.017 | 0.014 | 0.013 | 0.020 | 0.011 | 0.020 |
| 1     | 6pz     | 0.016 | 0.014 | 0.013 | 0.022 | 0.011 | 0.020 |
| 1     | 5dxy    | 0.061 | 0.054 | 0.051 | 0.117 | 0.045 | 0.082 |
| 1     | 5dxz    | 0.056 | 0.047 | 0.049 | 0.123 | 0.039 | 0.088 |
| 1     | 5dyz    | 0.040 | 0.032 | 0.032 | 0.090 | 0.026 | 0.057 |
| 1     | 5dx2-y2 | 0.066 | 0.056 | 0.054 | 0.125 | 0.046 | 0.079 |
| 1     | 5dz2    | 0.053 | 0.042 | 0.038 | 0.082 | 0.033 | 0.062 |
| 1     | 4f0     | 0.002 | 0.001 | 0.002 | 0.005 | 0.001 | 0.004 |
| 1     | 4f+1    | 0.003 | 0.005 | 0.003 | 0.012 | 0.001 | 0.002 |
| 1     | 4f-1    | 0.002 | 0.001 | 0.001 | 0.013 | 0.001 | 0.001 |
| 1     | 4f+2    | 0.003 | 0.002 | 0.001 | 0.007 | 0.001 | 0.004 |
| 1     | 4f-2    | 0.003 | 0.004 | 0.003 | 0.011 | 0.001 | 0.004 |
| 1     | 4f+3    | 0.003 | 0.002 | 0.001 | 0.005 | 0.002 | 0.003 |
| 1     | 4f-3    | 0.004 | 0.004 | 0.004 | 0.012 | 0.003 | 0.003 |
| 2     | 6S      | 0.002 | 0.001 | 0.001 | 0.001 | 0.001 | 0.036 |
| 2     | 6px     | 0.058 | 0.001 | 0.001 | 0.034 | 0.036 | 0.031 |
| 2     | 6py     | 0.023 | 0.014 | 0.012 | 0.011 | 0.011 | 0.018 |
| 2     | 6pz     | 0.023 | 0.014 | 0.013 | 0.012 | 0.012 | 0.019 |
| 2     | 5dxy    | 0.102 | 0.051 | 0.049 | 0.055 | 0.041 | 0.077 |
| 2     | 5dxz    | 0.094 | 0.051 | 0.048 | 0.050 | 0.041 | 0.079 |
| 2     | 5dyz    | 0.072 | 0.030 | 0.030 | 0.036 | 0.025 | 0.061 |
| 2     | 5dx2-y2 | 0.108 | 0.058 | 0.055 | 0.061 | 0.047 | 0.083 |
| 2     | 5dz2    | 0.085 | 0.040 | 0.041 | 0.046 | 0.035 | 0.066 |
| 2     | 4f0     | 0.005 | 0.002 | 0.001 | 0.001 | 0.001 | 0.004 |
| 2     | 4f+1    | 0.010 | 0.003 | 0.003 | 0.002 | 0.003 | 0.002 |
| 2     | 4f-1    | 0.003 | 0.001 | 0.001 | 0.001 | 0.001 | 0.002 |
| 2     | 4f+2    | 0.005 | 0.002 | 0.002 | 0.001 | 0.001 | 0.003 |
| 2     | 4f-2    | 0.008 | 0.002 | 0.003 | 0.002 | 0.001 | 0.005 |
| 2     | 4f+3    | 0.006 | 0.005 | 0.003 | 0.003 | 0.001 | 0.004 |
| 2     | 4f-3    | 0.009 | 0.003 | 0.002 | 0.001 | 0.001 | 0.002 |
|       |         | Tb    | Dy    | Ho    | Er    | Tm    | Yb    |
| Alpha |         |       |       |       |       |       |       |
| 1     | 6S      | 0.228 | 0.277 | 0.280 | 0.246 | 0.282 | 0.292 |
| 1     | 6px     | 0.225 | 0.203 | 0.202 | 0.224 | 0.202 | 0.197 |
| 1     | 6py     | 0.025 | 0.009 | 0.009 | 0.025 | 0.009 | 0.008 |
| 1     | 6pz     | 0.022 | 0.011 | 0.010 | 0.020 | 0.010 | 0.009 |

|      |         |       |       |       |       |       |         |
|------|---------|-------|-------|-------|-------|-------|---------|
| 1    | 5dxy    | 0.108 | 0.031 | 0.030 | 0.097 | 0.028 | 0.027   |
| 1    | 5dxz    | 0.112 | 0.029 | 0.028 | 0.097 | 0.024 | 0.024   |
| 1    | 5dyz    | 0.075 | 0.018 | 0.017 | 0.056 | 0.015 | 0.015   |
| 1    | 5dx2-y2 | 0.156 | 0.060 | 0.055 | 0.127 | 0.053 | 0.047   |
| 1    | 5dz2    | 0.096 | 0.035 | 0.032 | 0.086 | 0.031 | 0.029   |
| 1    | 4f0     | 1.000 | 0.999 | 0.999 | 1.000 | 0.999 | 0.999   |
| 1    | 4f+1    | 1.000 | 0.999 | 0.999 | 1.000 | 0.998 | 0.998   |
| 1    | 4f-1    | 1.000 | 0.999 | 0.999 | 1.000 | 0.999 | 0.999   |
| 1    | 4f+2    | 1.000 | 0.999 | 0.999 | 1.000 | 0.999 | 0.999   |
| 1    | 4f-2    | 0.999 | 0.999 | 0.999 | 1.000 | 0.999 | 0.999   |
| 1    | 4f+3    | 1.000 | 0.998 | 0.998 | 1.000 | 0.998 | 0.998   |
| 1    | 4f-3    | 0.999 | 0.998 | 0.998 | 1.000 | 0.998 | 0.998   |
| 2    | 6S      | 0.243 | 0.279 | 0.282 | 0.255 | 0.282 | 0.292   |
| 2    | 6px     | 0.222 | 0.204 | 0.202 | 0.223 | 0.202 | 0.197   |
| 2    | 6py     | 0.023 | 0.009 | 0.009 | 0.023 | 0.008 | 0.008   |
| 2    | 6pz     | 0.020 | 0.011 | 0.011 | 0.018 | 0.011 | 0.010   |
| 2    | 5dxy    | 0.102 | 0.029 | 0.027 | 0.084 | 0.026 | 0.024   |
| 2    | 5dxz    | 0.092 | 0.028 | 0.027 | 0.082 | 0.027 | 0.025   |
| 2    | 5dyz    | 0.077 | 0.018 | 0.017 | 0.069 | 0.015 | 0.015   |
| 2    | 5dx2-y2 | 0.147 | 0.062 | 0.058 | 0.127 | 0.055 | 0.050   |
| 2    | 5dz2    | 0.107 | 0.034 | 0.032 | 0.085 | 0.029 | 0.027   |
| 2    | 4f0     | 1.000 | 0.999 | 0.999 | 1.000 | 0.999 | 0.999   |
| 2    | 4f+1    | 1.000 | 0.999 | 0.999 | 1.000 | 0.998 | 0.998   |
| 2    | 4f-1    | 1.000 | 0.999 | 0.999 | 1.000 | 0.999 | 0.999   |
| 2    | 4f+2    | 0.999 | 0.999 | 0.999 | 1.000 | 0.999 | 0.998   |
| 2    | 4f-2    | 1.000 | 0.999 | 0.999 | 1.000 | 0.999 | 0.999   |
| 2    | 4f+3    | 0.999 | 0.998 | 0.998 | 0.999 | 0.998 | 0.998   |
| 2    | 4f-3    | 1.000 | 0.998 | 0.998 | 1.000 | 0.998 | 0.998   |
| Beta |         |       |       |       |       |       |         |
| 1    | 6S      | 0.036 | 0.020 | 0.020 | 0.037 | 0.020 | 0.02088 |
| 1    | 6px     | 0.029 | 0.023 | 0.021 | 0.024 | 0.017 | 0.01584 |
| 1    | 6py     | 0.019 | 0.009 | 0.009 | 0.019 | 0.008 | 0.00783 |
| 1    | 6pz     | 0.020 | 0.010 | 0.009 | 0.018 | 0.008 | 0.0079  |
| 1    | 5dxy    | 0.082 | 0.028 | 0.027 | 0.081 | 0.026 | 0.02527 |
| 1    | 5dxz    | 0.089 | 0.025 | 0.024 | 0.081 | 0.022 | 0.02166 |
| 1    | 5dyz    | 0.061 | 0.015 | 0.015 | 0.051 | 0.014 | 0.01407 |
| 1    | 5dx2-y2 | 0.077 | 0.027 | 0.026 | 0.072 | 0.025 | 0.02429 |
| 1    | 5dz2    | 0.059 | 0.022 | 0.021 | 0.063 | 0.021 | 0.02072 |
| 1    | 4f0     | 0.015 | 0.131 | 0.693 | 0.292 | 0.954 | 0.99863 |
| 1    | 4f+1    | 0.177 | 0.656 | 0.169 | 0.888 | 0.736 | 0.99768 |
| 1    | 4f-1    | 0.034 | 0.770 | 0.786 | 0.733 | 0.977 | 0.99889 |
| 1    | 4f+2    | 0.170 | 0.052 | 0.300 | 0.454 | 0.929 | 0.99873 |
| 1    | 4f-2    | 0.501 | 0.393 | 0.907 | 0.550 | 0.963 | 0.99814 |
| 1    | 4f+3    | 0.095 | 0.702 | 0.957 | 0.787 | 0.777 | 0.99779 |
| 1    | 4f-3    | 0.047 | 0.259 | 0.170 | 0.417 | 0.652 | 0.9979  |
| 2    | 6S      | 0.036 | 0.021 | 0.021 | 0.038 | 0.020 | 0.02107 |
| 2    | 6px     | 0.030 | 0.023 | 0.021 | 0.025 | 0.017 | 0.01599 |

|   |                                  |       |       |       |       |       |         |
|---|----------------------------------|-------|-------|-------|-------|-------|---------|
| 2 | 6py                              | 0.018 | 0.009 | 0.009 | 0.017 | 0.008 | 0.00789 |
| 2 | 6pz                              | 0.018 | 0.009 | 0.009 | 0.017 | 0.008 | 0.0081  |
| 2 | 5dxy                             | 0.073 | 0.026 | 0.024 | 0.072 | 0.024 | 0.02297 |
| 2 | 5dxz                             | 0.076 | 0.024 | 0.023 | 0.072 | 0.023 | 0.0223  |
| 2 | 5dyz                             | 0.062 | 0.016 | 0.016 | 0.061 | 0.016 | 0.01562 |
| 2 | 5dx <sup>2</sup> -y <sup>2</sup> | 0.084 | 0.030 | 0.029 | 0.076 | 0.027 | 0.02766 |
| 2 | 5dz <sup>2</sup>                 | 0.068 | 0.022 | 0.022 | 0.062 | 0.020 | 0.01964 |
| 2 | 4f0                              | 0.010 | 0.353 | 0.003 | 0.444 | 0.909 | 0.99856 |
| 2 | 4f+1                             | 0.050 | 0.063 | 0.993 | 0.639 | 0.827 | 0.9977  |
| 2 | 4f-1                             | 0.026 | 0.804 | 0.991 | 0.758 | 0.992 | 0.9984  |
| 2 | 4f+2                             | 0.845 | 0.425 | 0.409 | 0.809 | 0.812 | 0.99848 |
| 2 | 4f-2                             | 0.062 | 0.519 | 0.394 | 0.281 | 0.977 | 0.99884 |
| 2 | 4f+3                             | 0.016 | 0.244 | 0.602 | 0.395 | 0.586 | 0.9978  |
| 2 | 4f-3                             | 0.033 | 0.560 | 0.589 | 0.800 | 0.886 | 0.99792 |

\* Note here that the DFT-derived spin populations and orbital occupations reported here should be interpreted with caution, as single-determinant methods may not reliably capture the electronic structure of anisotropic lanthanide systems with partially filled 4f shells. These results are therefore provided for qualitative comparison, while the multireference CASSCF treatment offers a more robust description.

**Table S8:** Energies (atomic units) of HS, BS1 and BS2 for Gd<sub>2</sub>@C<sub>79</sub>N, Tb<sub>2</sub>@C<sub>79</sub>N, Dy<sub>2</sub>@C<sub>79</sub>N, Ho<sub>2</sub>@C<sub>79</sub>N, Er<sub>2</sub>@C<sub>79</sub>N, Tm<sub>2</sub>@C<sub>79</sub>N and Yb<sub>2</sub>@C<sub>79</sub>N.

|                                                                                                                                                                                                                           | Gd              | Tb       | Dy       | Ho       | Er       | Tm       | Yb       |
|---------------------------------------------------------------------------------------------------------------------------------------------------------------------------------------------------------------------------|-----------------|----------|----------|----------|----------|----------|----------|
| <p><b>Table S5:</b> The orbital occupation of the one unpaired electron in Gd<sub>2</sub>@C<sub>79</sub>N. This has been computed for S = 15/2 state from <i>ab initio</i> calculation with CAS (15,15) active space.</p> |                 |          |          |          |          |          |          |
| H                                                                                                                                                                                                                         | -3287.27        | -3287.27 | -3287.23 | -3287.23 | -3287.27 | -3287.24 | -3287.24 |
| S                                                                                                                                                                                                                         | 4311            | 4178     | 6328     | 8511     | 2799     | 3251     | 3270     |
| BS                                                                                                                                                                                                                        | -3287.26        | -3287.26 | -3287.22 | -3287.23 | -3287.26 | -3287.23 | -3287.23 |
| 1                                                                                                                                                                                                                         | 7225            | 7219     | 8261     | 0479     | 5824     | 5008     | 5052     |
|                                                                                                                                                                                                                           | 6s              |          |          | 0.29     |          |          |          |
|                                                                                                                                                                                                                           | 5p <sub>z</sub> |          |          | 0.10     |          |          |          |
|                                                                                                                                                                                                                           | 6p <sub>z</sub> |          |          | 0.26     |          |          |          |
|                                                                                                                                                                                                                           | 5d <sub>0</sub> |          |          | 0.35     |          |          |          |

**Table S6:** |V(r)|/G(r) for all the bond critical points properties for Ln–Ln in **1**<sub>Ce</sub>–**1**<sub>Yb</sub>. V(r) is the Virial Field function, G(r) is the electronic kinetic energy density, |V(r)|/G(r) is the ratio of Virial field function to Electronic kinetic energy.

| Metal ion              | V(r) /G(r) | Metal ion              | V(r) /G(r) |
|------------------------|------------|------------------------|------------|
| <b>1</b> <sub>Ce</sub> | 1.142      | <b>1</b> <sub>Tb</sub> | 3.001      |
| <b>1</b> <sub>Pr</sub> | 0.918      | <b>1</b> <sub>Dy</sub> | 1.927      |
| <b>1</b> <sub>Nd</sub> | 0.861      | <b>1</b> <sub>Ho</sub> | 1.984      |
| <b>1</b> <sub>Pm</sub> | 0.801      | <b>1</b> <sub>Er</sub> | 3.001      |
| <b>1</b> <sub>Sm</sub> | 0.875      | <b>1</b> <sub>Tm</sub> | 2.256      |
| <b>1</b> <sub>Gd</sub> | 2.932      | <b>1</b> <sub>Yb</sub> | 2.666      |

**Table S7:** The delocalisation indices  $\delta(\text{Ln}, \text{Ln})$  for Ln–Ln found in **1**<sub>Ce</sub>–**1**<sub>Yb</sub>.

| Metal ion              | $\delta(\text{Ln}, \text{Ln})$ | Metal ion              | $\delta(\text{Ln}, \text{Ln})$ |
|------------------------|--------------------------------|------------------------|--------------------------------|
| <b>1</b> <sub>Ce</sub> | 0.428                          | <b>1</b> <sub>Tb</sub> | 0.512                          |
| <b>1</b> <sub>Pr</sub> | 0.223                          | <b>1</b> <sub>Dy</sub> | 0.534                          |
| <b>1</b> <sub>Nd</sub> | 0.194                          | <b>1</b> <sub>Ho</sub> | 0.529                          |
| <b>1</b> <sub>Pm</sub> | 0.163                          | <b>1</b> <sub>Er</sub> | 0.504                          |
| <b>1</b> <sub>Sm</sub> | 0.153                          | <b>1</b> <sub>Tm</sub> | 0.522                          |
| <b>1</b> <sub>Gd</sub> | 0.517                          | <b>1</b> <sub>Yb</sub> | 0.520                          |

|         |                  |                  |                  |                  |                  |                  |                  |
|---------|------------------|------------------|------------------|------------------|------------------|------------------|------------------|
| BS<br>2 | -3287.25<br>9332 | -3287.25<br>9368 | -3287.22<br>2148 | -3287.22<br>3962 | -3287.25<br>7987 | -3287.22<br>7285 | -3287.22<br>7354 |
|---------|------------------|------------------|------------------|------------------|------------------|------------------|------------------|

| <b>Table S9:</b> $S^2$ of HS, BS1 and BS2 configurations for $Gd_2@C_{79}N$ . |                       |
|-------------------------------------------------------------------------------|-----------------------|
|                                                                               | $\langle S^2 \rangle$ |
| HS                                                                            | 63.7                  |
| BS1                                                                           | 7.7                   |
| BS2                                                                           | 49.7                  |

| <b>Table S10:</b> The relative energies (atomic units) of the different spin states are reported with respect to the ground state; State 1 corresponds to the low-spin configuration, while State 2 corresponds to the high-spin configuration. |       |       |       |       |       |
|-------------------------------------------------------------------------------------------------------------------------------------------------------------------------------------------------------------------------------------------------|-------|-------|-------|-------|-------|
| State                                                                                                                                                                                                                                           | Pr    | Nd    | Pm    | Sm    | Tb    |
| State 1                                                                                                                                                                                                                                         | 0.028 | 0.066 | 0.069 | 0.015 | 0.021 |
| State 2                                                                                                                                                                                                                                         | 0.089 | 0.164 | 0.124 | 0.203 | 0.158 |
|                                                                                                                                                                                                                                                 | Dy    | Ho    | Er    | Tm    |       |
| State 1                                                                                                                                                                                                                                         | 0.041 | 0.081 | 0.083 | 0.036 |       |
| State 2                                                                                                                                                                                                                                         | 0.211 | 0.146 | 0.208 | 0.122 |       |

| <b>Table S11 :</b> The energy of the all-possible spin states of $Gd_2@C_{79}N$ . |              |                                                                              |
|-----------------------------------------------------------------------------------|--------------|------------------------------------------------------------------------------|
| Spin Multiplicity ( $2S+1$ )                                                      | Energy (a.u) | The difference in energy of the two roots divided by $2S+1$ in $cm^{-1}$ (B) |
| 16                                                                                | -25569.982   |                                                                              |
| 14                                                                                | -25569.981   | 442.9                                                                        |
|                                                                                   | -25569.966   |                                                                              |
| 12                                                                                | -25569.967   | 442.9                                                                        |
|                                                                                   | -25569.967   |                                                                              |

|    |            |       |
|----|------------|-------|
| 10 | -25569.965 | 442.9 |
|    | -25569.989 |       |
| 8  | -25569.966 | 442.9 |
|    | -25569.986 |       |
| 6  | -25569.988 | 442.9 |
|    | -25569.983 |       |
| 4  | -25569.985 | 442.9 |
|    | -25569.980 |       |
| 2  | -25569.982 |       |

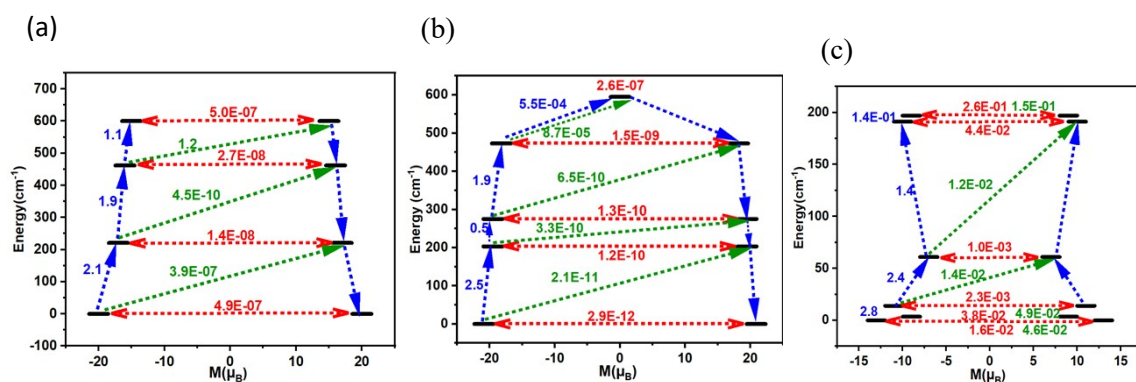

**Figure S2:** Relaxation mechanism of (a)  $1_{Tb}$ , (b)  $1_{Dy}$  and (c)  $1_{Ho}$ .

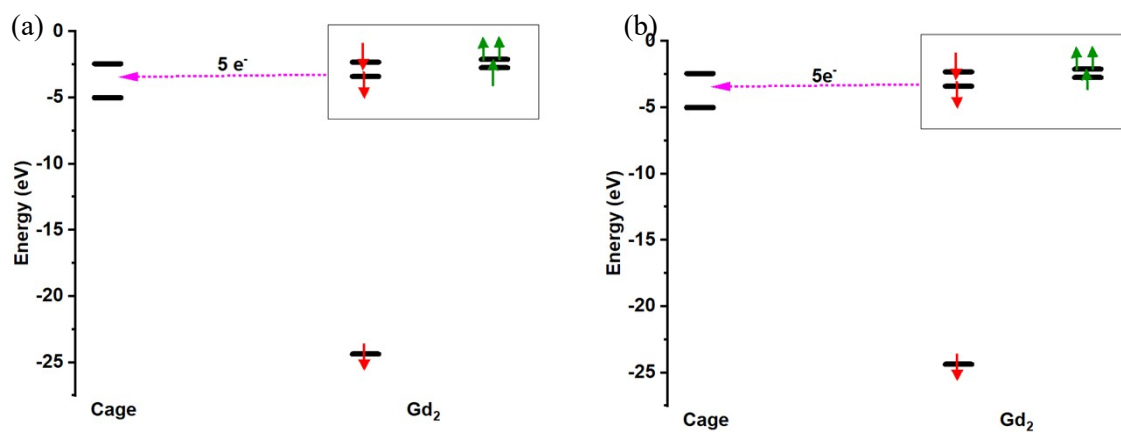

**Figure S3:** The MO diagrams corresponding to the formation of (a)  $1_{opt}$  and (b)  $1_{x+10}$ . Green arrows represent alpha electrons whereas red arrows represent beta electrons.

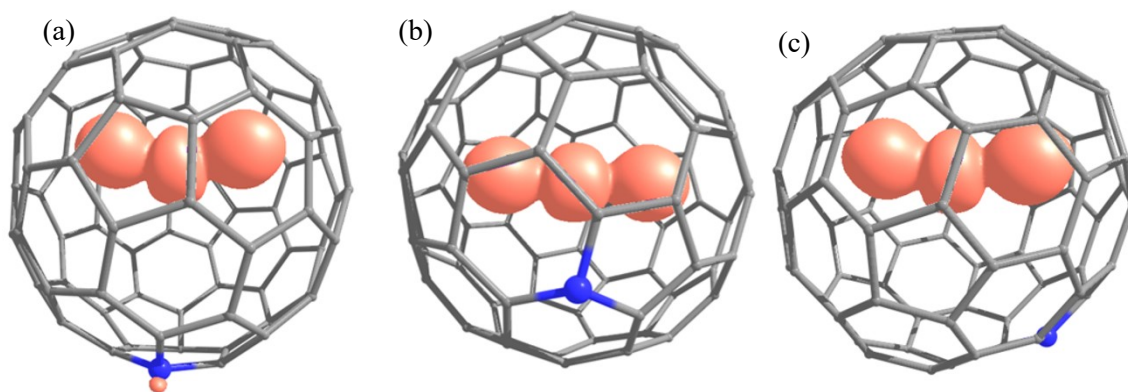

**Figure S4:** DFT computed spin population plot of (a)  $\mathbf{1}_{z+10}$ , (b)  $\mathbf{1}_{opt}$ , (c)  $\mathbf{1}_{x+10}$ . The corresponding spin population plots for the high spin state are given in figures (a-d) with an isosurface value of  $0.006 \text{ e}^- \text{ bohr}^{-3}$

**Table S12:** Gd–Gd bond distance and Electron density at the BCP between two  $\text{Gd}^{\text{III}}$  atoms under the application of OEEF.

| Structure           | Gd–Gd bond distance (Å) | Electron Density ( $\text{e}\text{\AA}^{-3}$ ) | Structure           | Gd–Gd bond distance (Å) | Electron Density ( $\text{e}\text{\AA}^{-3}$ ) |
|---------------------|-------------------------|------------------------------------------------|---------------------|-------------------------|------------------------------------------------|
| $\mathbf{1}_{z+1}$  | 3.733                   | 0.0204                                         | $\mathbf{1}_{z-1}$  | 3.762                   | 0.0201                                         |
| $\mathbf{1}_{z+2}$  | 3.744                   | 0.0202                                         | $\mathbf{1}_{z-2}$  | 3.770                   | 0.0200                                         |
| $\mathbf{1}_{z+4}$  | 3.760                   | 0.0201                                         | $\mathbf{1}_{z-4}$  | 3.649                   | 0.0219                                         |
| $\mathbf{1}_{z+6}$  | 3.594                   | 0.0224                                         | $\mathbf{1}_{z-6}$  | 3.624                   | 0.0224                                         |
| $\mathbf{1}_{z+8}$  | 3.798                   | 0.0194                                         | $\mathbf{1}_{z-8}$  | 3.601                   | 0.0209                                         |
| $\mathbf{1}_{z+10}$ | 3.499                   | 0.0251                                         | $\mathbf{1}_{z-10}$ | 3.573                   | 0.0235                                         |
| $\mathbf{1}_{x+1}$  | 3.736                   | 0.0188                                         | $\mathbf{1}_{x-1}$  | 3.722                   | 0.0193                                         |
| $\mathbf{1}_{x+2}$  | 3.716                   | 0.02067                                        | $\mathbf{1}_{x-2}$  | 3.665                   | 0.0210                                         |
| $\mathbf{1}_{x+4}$  | 3.651                   | 0.0207                                         | $\mathbf{1}_{x-4}$  | 3.609                   | 0.0026                                         |
| $\mathbf{1}_{x+6}$  | 3.545                   | 0.0237                                         | $\mathbf{1}_{x-6}$  | 3.523                   | 0.0242                                         |
| $\mathbf{1}_{x+8}$  | 3.402                   | 0.0263                                         | $\mathbf{1}_{x-8}$  | 3.441                   | 0.0263                                         |
| $\mathbf{1}_{x+10}$ | 3.316                   | 0.0290                                         | $\mathbf{1}_{x-10}$ | 3.340                   | 0.0287                                         |
| $\mathbf{1}_{y+1}$  | 3.691                   | 0.0211                                         | $\mathbf{1}_{y-1}$  | 3.800                   | 0.0196                                         |
| $\mathbf{1}_{y+2}$  | 3.648                   | 0.0218                                         | $\mathbf{1}_{y-2}$  | 3.806                   | 0.0195                                         |
| $\mathbf{1}_{y+4}$  | 3.573                   | 0.0234                                         | $\mathbf{1}_{y-4}$  | 3.690                   | 0.0207                                         |
| $\mathbf{1}_{y+6}$  | 3.486                   | 0.0253                                         | $\mathbf{1}_{y-6}$  | 3.615                   | 0.0227                                         |
| $\mathbf{1}_{y+8}$  | 3.390                   | 0.0263                                         | $\mathbf{1}_{y-8}$  | 3.542                   | 0.0244                                         |
| $\mathbf{1}_{y+10}$ | 3.299                   | 0.0290                                         | $\mathbf{1}_{y-10}$ | 3.464                   | 0.0261                                         |

**Table S13:** Electric field vectors and magnitudes at the Dy center estimated from a point-charge model using LoProp charges and optimized coordinates, for field-free and electric-field-perturbed structures.

| <b>Molecule</b>         | <b>Electric Field experienced<br/>by Central metal ion (V/Å)<br/>on Dy1</b> | <b>E<sub>x</sub></b> | <b>E<sub>y</sub></b> | <b>E<sub>z</sub></b> |
|-------------------------|-----------------------------------------------------------------------------|----------------------|----------------------|----------------------|
| <b>1</b>                | 1.008                                                                       | 0.145                | -0.02084             | 0.998                |
| <b>1<sub>x+1</sub></b>  | 1.054                                                                       | 0.227                | -0.07384             | 1.027                |
| <b>1<sub>x+2</sub></b>  | 1.079                                                                       | 0.229                | -0.09746             | 1.051                |
| <b>1<sub>x+4</sub></b>  | 1.102                                                                       | 0.193                | 0.029                | 1.085                |
| <b>1<sub>x+6</sub></b>  | 1.238                                                                       | 0.365                | 0.097                | 1.180                |
| <b>1<sub>x+8</sub></b>  | 1.418                                                                       | 0.545                | 0.197                | 1.295                |
| <b>1<sub>x+10</sub></b> | 1.471                                                                       | 0.573                | 0.229                | 1.336                |
| <b>1<sub>x-1</sub></b>  | 0.993                                                                       | 0.083                | -0.01783             | 0.990                |
| <b>1<sub>x-2</sub></b>  | 0.971                                                                       | -0.13651             | -0.23057             | 0.933                |
| <b>1<sub>x-4</sub></b>  | 1.001                                                                       | -0.06911             | -0.16064             | 0.985                |
| <b>1<sub>x-6</sub></b>  | 0.987                                                                       | -0.1624              | -0.25065             | 0.941                |
| <b>1<sub>x-8</sub></b>  | 1.019                                                                       | -0.16888             | -0.26522             | 0.970                |
| <b>1<sub>x-10</sub></b> | 1.063                                                                       | -0.12151             | -0.23921             | 1.028                |
| <b>1<sub>y+1</sub></b>  | 1.012                                                                       | 0.133                | -0.05776             | 1.001                |
| <b>1<sub>y+2</sub></b>  | 1.010                                                                       | 0.099                | -0.07732             | 1.002                |
| <b>1<sub>y+4</sub></b>  | 1.009                                                                       | 0.087                | -0.08551             | 1.001                |
| <b>1<sub>y+6</sub></b>  | 1.024                                                                       | 0.084                | -0.08393             | 1.017                |
| <b>1<sub>y+8</sub></b>  | 1.085                                                                       | 0.073                | -0.03467             | 1.082                |
| <b>1<sub>y+10</sub></b> | 1.157                                                                       | 0.113                | -0.01897             | 1.152                |
| <b>1<sub>y-1</sub></b>  | 0.926                                                                       | 0.138                | 0.132                | 0.907                |
| <b>1<sub>y-2</sub></b>  | 0.943                                                                       | 0.186                | 0.130                | 0.916                |
| <b>1<sub>y-4</sub></b>  | 0.956                                                                       | 0.046                | -0.1548              | 0.942                |
| <b>1<sub>y-6</sub></b>  | 0.949                                                                       | -0.01632             | -0.15344             | 0.937                |
| <b>1<sub>y-8</sub></b>  | 0.943                                                                       | -0.02391             | -0.14966             | 0.930                |
| <b>1<sub>y-10</sub></b> | 0.963                                                                       | -0.04329             | -0.17646             | 0.946                |
| <b>1<sub>z+1</sub></b>  | 1.030                                                                       | 0.192                | -0.09542             | 1.008                |
| <b>1<sub>z+2</sub></b>  | 1.035                                                                       | 0.196                | -0.15393             | 1.004                |
| <b>1<sub>z+4</sub></b>  | 0.998                                                                       | 0.140                | -0.33345             | 0.930                |
| <b>1<sub>z+6</sub></b>  | 0.965                                                                       | 0.115                | -0.57026             | 0.770                |
| <b>1<sub>z+10</sub></b> | 1.039                                                                       | 0.191                | -0.709               | 0.735                |
| <b>1<sub>z-1</sub></b>  | 0.965                                                                       | 0.135                | 0.084                | 0.952                |
| <b>1<sub>z-2</sub></b>  | 0.938                                                                       | 0.121                | 0.119                | 0.923                |
| <b>1<sub>z-4</sub></b>  | 1.085                                                                       | 0.231                | 0.608                | 0.868                |
| <b>1<sub>z-6</sub></b>  | 1.099                                                                       | 0.257                | 0.637                | 0.858                |
| <b>1<sub>z-8</sub></b>  | 1.108                                                                       | 0.271                | 0.654                | 0.853                |
| <b>1<sub>z-10</sub></b> | 1.124                                                                       | 0.281                | 0.672                | 0.856                |
| <b>Molecule</b>         | <b>Electric Field experienced<br/>by Central metal ion (V/Å)<br/>on Dy2</b> | <b>E<sub>x</sub></b> | <b>E<sub>y</sub></b> | <b>E<sub>z</sub></b> |
| <b>1</b>                | 0.966                                                                       | 0.029                | -0.05099             | -0.96396             |
| <b>1<sub>x+1</sub></b>  | 0.948                                                                       | 0.008                | 0.025                | -0.9481              |
| <b>1<sub>x+2</sub></b>  | 0.950                                                                       | 0.035                | 0.063                | -0.9471              |

|                     |       |          |          |          |
|---------------------|-------|----------|----------|----------|
| $\mathbf{1}_{x+4}$  | 0.969 | 0.121    | -0.0497  | -0.9601  |
| $\mathbf{1}_{x+6}$  | 0.973 | 0.078    | -0.04239 | -0.96873 |
| $\mathbf{1}_{x+8}$  | 0.987 | 0.031    | -0.02944 | -0.98607 |
| $\mathbf{1}_{x+10}$ | 0.996 | -0.00067 | -0.00808 | -0.99596 |
| $\mathbf{1}_{x-1}$  | 0.975 | 0.046    | -0.06577 | -0.97183 |
| $\mathbf{1}_{x-2}$  | 0.958 | 0.242    | 0.151    | -0.91457 |
| $\mathbf{1}_{x-4}$  | 0.988 | 0.054    | 0.024    | -0.98602 |
| $\mathbf{1}_{x-6}$  | 0.952 | 0.199    | 0.130    | -0.92205 |
| $\mathbf{1}_{x-8}$  | 0.988 | 0.188    | 0.145    | -0.95905 |
| $\mathbf{1}_{x-10}$ | 1.045 | 0.138    | 0.111    | -1.02992 |
| $\mathbf{1}_{y+1}$  | 0.963 | 0.041    | -0.01239 | -0.96193 |
| $\mathbf{1}_{y+2}$  | 0.964 | 0.070    | 0.006    | -0.96164 |
| $\mathbf{1}_{y+4}$  | 0.964 | 0.085    | 0.012    | -0.9604  |
| $\mathbf{1}_{y+6}$  | 0.977 | 0.096    | 0.010    | -0.97266 |
| $\mathbf{1}_{y+8}$  | 1.028 | 0.080    | 0.080    | -1.02209 |
| $\mathbf{1}_{y+10}$ | 1.074 | 0.073    | 0.085    | -1.06847 |
| $\mathbf{1}_{y-1}$  | 0.910 | 0.039    | -0.22494 | -0.88045 |
| $\mathbf{1}_{y-2}$  | 0.891 | 0.015    | -0.21634 | -0.8646  |
| $\mathbf{1}_{y-4}$  | 0.918 | 0.058    | 0.048    | -0.91507 |
| $\mathbf{1}_{y-6}$  | 0.922 | 0.099    | 0.019    | -0.91635 |
| $\mathbf{1}_{y-8}$  | 0.938 | 0.118    | 0.014    | -0.93057 |
| $\mathbf{1}_{y-10}$ | 0.974 | 0.124    | -0.00623 | -0.96571 |
| $\mathbf{1}_{z+1}$  | 1.030 | 0.192    | -0.09551 | 1.008    |
| $\mathbf{1}_{z+2}$  | 0.937 | -0.00146 | 0.092    | -0.93238 |
| $\mathbf{1}_{z+4}$  | 0.891 | 0.023    | 0.261    | -0.852   |
| $\mathbf{1}_{z+6}$  | 0.922 | 0.007    | 0.648    | -0.65601 |
| $\mathbf{1}_{z+10}$ | 0.980 | -0.01879 | 0.678    | -0.70792 |
| $\mathbf{1}_{z-1}$  | 0.955 | 0.032    | -0.17109 | -0.93949 |
| $\mathbf{1}_{z-2}$  | 0.936 | 0.046    | -0.2069  | -0.91192 |
| $\mathbf{1}_{z-4}$  | 0.997 | 0.043    | -0.59395 | -0.7998  |
| $\mathbf{1}_{z-6}$  | 0.997 | 0.033    | -0.61562 | -0.78365 |
| $\mathbf{1}_{z-8}$  | 0.998 | 0.027    | -0.62799 | -0.77504 |
| $\mathbf{1}_{z-10}$ | 1.006 | 0.021    | -0.64047 | -0.77513 |

**Table S14:** Variation of energy barrier as a function of OEEF.

| <b>Structure</b>   | <b>Energy Barrier (cm<sup>-1</sup>)</b> | <b>Structure</b>   | <b>Energy Barrier (cm<sup>-1</sup>)</b> |
|--------------------|-----------------------------------------|--------------------|-----------------------------------------|
| $\mathbf{1}_{z+1}$ | 194.2                                   | $\mathbf{1}_{z-1}$ | 431.7                                   |
| $\mathbf{1}_{z+2}$ | 397.5                                   | $\mathbf{1}_{z-2}$ | 445.6                                   |
| $\mathbf{1}_{z+4}$ | 429.3                                   | $\mathbf{1}_{z-4}$ | 302.9                                   |
| $\mathbf{1}_{z+6}$ | 341.5                                   | $\mathbf{1}_{z-6}$ | 310.3                                   |
| $\mathbf{1}_{z+8}$ | 389.4                                   | $\mathbf{1}_{z-8}$ | 307.1                                   |

|                     |       |                     |       |
|---------------------|-------|---------------------|-------|
| $\mathbf{1}_{z+10}$ | 331.8 | $\mathbf{1}_{z-10}$ | 301.6 |
| $\mathbf{1}_{x+1}$  | 393.8 | $\mathbf{1}_{x-1}$  | 472.4 |
| $\mathbf{1}_{x+2}$  | 234.4 | $\mathbf{1}_{x-2}$  | 317.9 |
| $\mathbf{1}_{x+4}$  | 396.4 | $\mathbf{1}_{x-4}$  | 389.2 |
| $\mathbf{1}_{x+6}$  | 479.8 | $\mathbf{1}_{x-6}$  | 357.4 |
| $\mathbf{1}_{x+8}$  | 407.4 | $\mathbf{1}_{x-8}$  | 353.7 |
| $\mathbf{1}_{+10}$  | 456.4 | $\mathbf{1}_{x-10}$ | 337.6 |
| $\mathbf{1}_{y+1}$  | 476.7 | $\mathbf{1}_{y-1}$  | 498.4 |
| $\mathbf{1}_{y+2}$  | 308.9 | $\mathbf{1}_{y-2}$  | 489.6 |
| $\mathbf{1}_{y+4}$  | 331.6 | $\mathbf{1}_{y-4}$  | 463.2 |
| $\mathbf{1}_{y+6}$  | 335.5 | $\mathbf{1}_{y-6}$  | 315.3 |
| $\mathbf{1}_{y+8}$  | 323.1 | $\mathbf{1}_{y-8}$  | 347.3 |
| $\mathbf{1}_{y+10}$ | 294.0 | $\mathbf{1}_{y-10}$ | 357.3 |

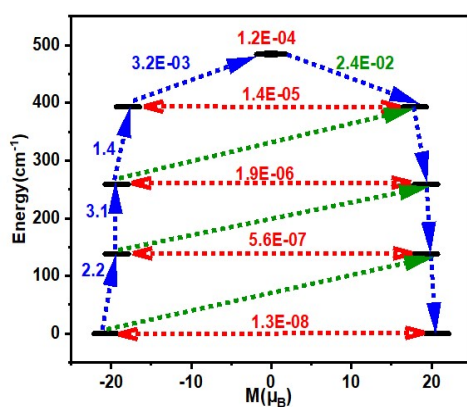

Figure S4: Relaxation mechanism of  $\mathbf{1}_{opt}$ .
